# Supplementary material for: Improved Mechanical Strength of Dicatechol Crosslinked MXene Films for Electromagnetic Interference Shielding Performance
Source: MDPI journal article supplement (doi:10.3390/nano13050787), 2023-02-21
Supplement: s1 [file s1]

## Supplementary Materials

### Improved Mechanical Strength of Dicatechol Crosslinked MXene Films for Electromagnetic Interference Shielding Performance

Soyeon Kim<sup>a,1</sup>, Canh Minh Vu<sup>b,1</sup>, Suehyeon Kim<sup>a</sup>, Insik In<sup>a,c,\*</sup>, Jihoon Lee<sup>a,c,\*</sup>

<sup>a</sup>*Department of IT-Energy Convergence (BK21 FOUR), Korea National University of Transportation, Chungju 27469, Republic of Korea.*

<sup>b</sup>*Advanced Institute of Science and Technology, The University of Da Nang, Da Nang 550000, Viet Nam.*

<sup>c</sup>*Department of Polymer Science and Engineering, Korea National University of Transportation, Chungju 27469, Republic of Korea.*

<sup>1</sup>The authors are contributed equally to this work.

\*Corresponding authors: Insik In (in1@ut.ac.kr) and Jihoon Lee (jihoonli@ut.ac.kr).

The EMI shielding performance was measured by using a vector network analyzer (E5063A ENA, Keysight Technologies, USA) with an airline kit (85051BR03) in the frequency range of 2–18 GHz based on the coaxial method. The samples were cut into a rectangular shape (with inner and outer diameters of 2 and 3 mm, respectively). The samples were sandwiched between two rectangular sample flanges. The scattering parameters ( $S_{11}$  and  $S_{21}$ ) were collected to calculate the coefficients of reflection ( $R$ ) and absorption ( $A$ ). Finally, the shielding effectiveness of reflection ( $SE_R$ ), absorption ( $SE_A$ ) and total shielding effectiveness ( $SE_T$ ) were determined using the following equations:

$$R = |S_{11}|^2 \quad (1)$$

$$T = |S_{21}|^2 \quad (2)$$

$$A = 1 - R - T \quad (3)$$

$$SE_R = -10 \log_{10}(1 - R) \quad (4)$$

$$SE_A = -10 \log_{10}[T/(1 - R)] \quad (5)$$

$$SE_T = -10 \log_{10}(T) \quad (6)$$

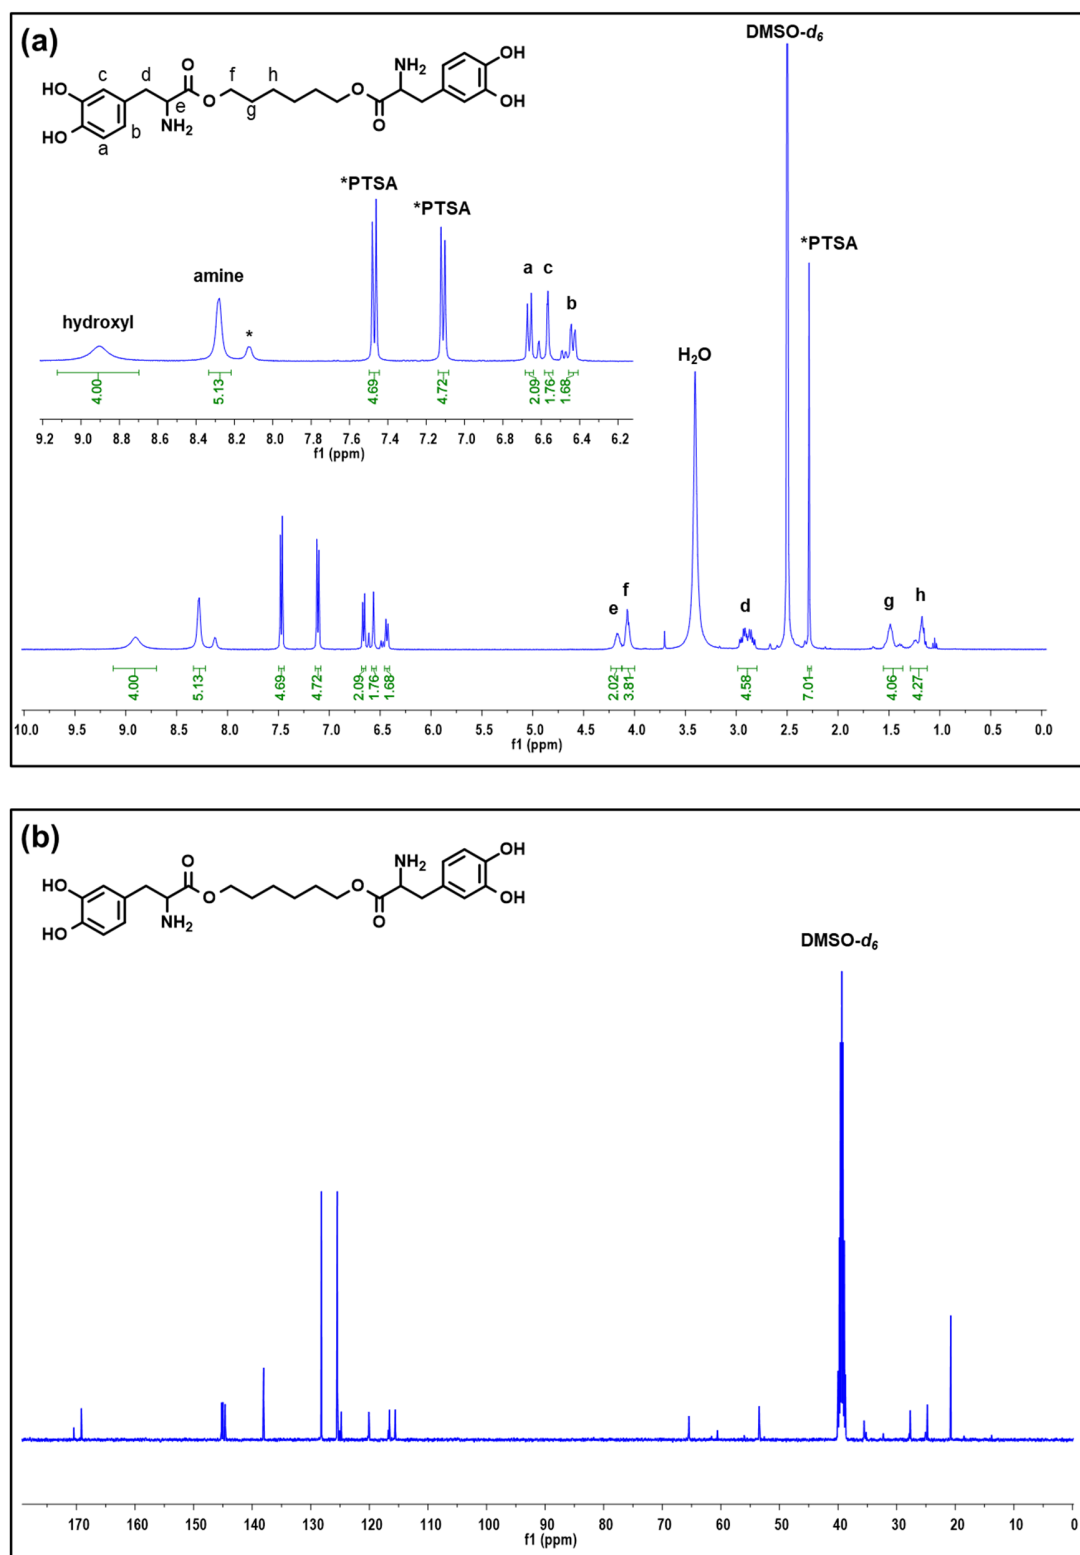

**Figure S1.** (a)  $^1\text{H}$ -NMR and (b)  $^{13}\text{C}$ -NMR spectra of the synthesized DC in DMSO- $d_6$ . The asterisk means the residual chloroform and PTSA.

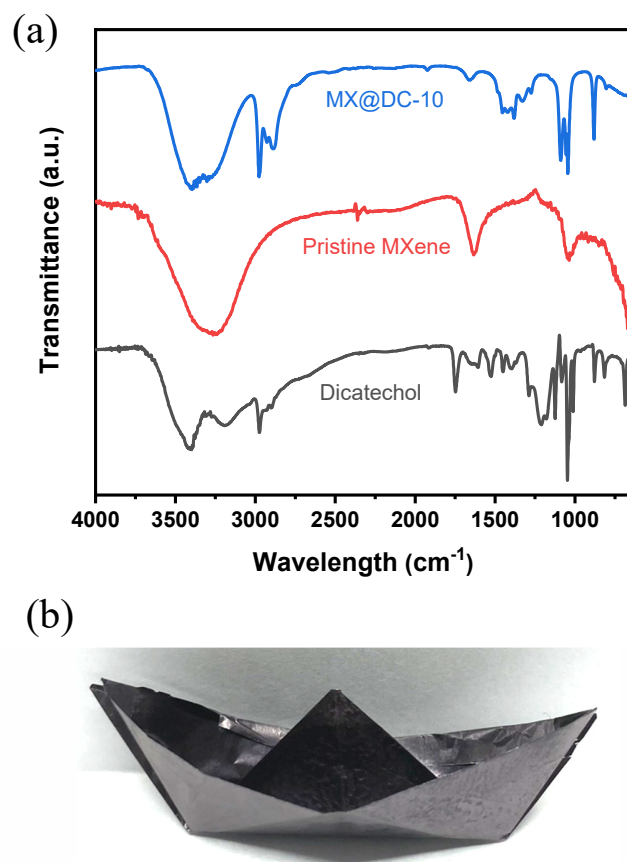

**Figure S2.** (a) FT-IR spectra of DC, pristine MXene and MX@DC-10 films, and (b) Digital photograph of the MX@DC-5 film which was shaped into a boat.

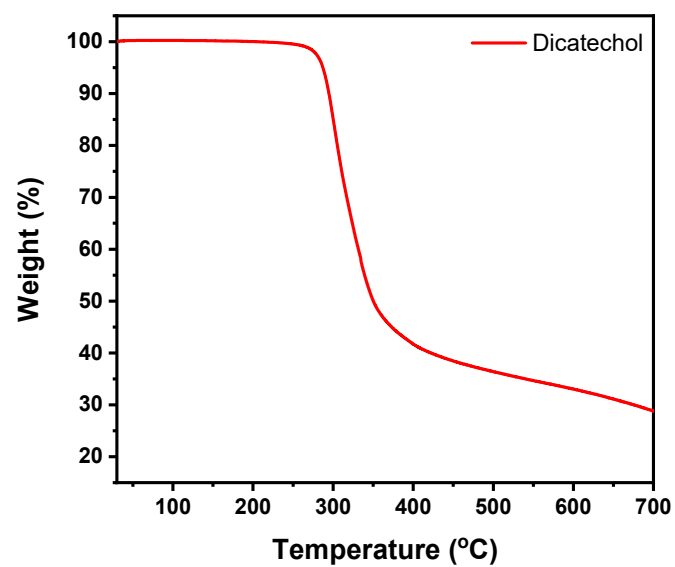

**Figure S3.** TGA curve of the synthesized DC.

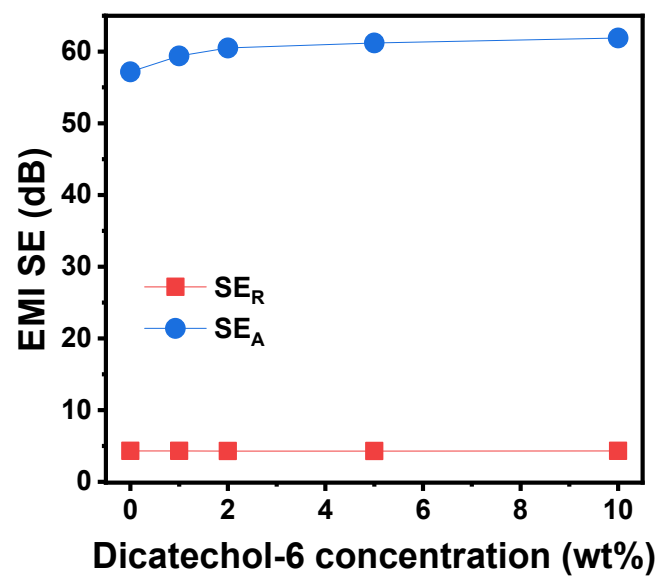

**Figure S4.** EMI SE of reflection ( $SE_R$ ) and absorption ( $SE_A$ ) of the MX@DC-x films as a function of DC concentration.

**Table S1.** EDS of MAX and MXene.

| <b>Element</b> | <b>wt%</b> |              |
|----------------|------------|--------------|
|                | <b>MAX</b> | <b>Mxene</b> |
| Ti             | 60.18      | 52.47        |
| Al             | 14.92      | 0.19         |
| C              | 15.25      | 19.46        |
| O              | 9.65       | 18.9         |
| F              | -          | 6.18         |
| Cl             | -          | 2.8          |

**Table S2.**  $I_D/I_G$  ratio of MXene and MX@DC- $x$  films.

| Films          | $I_D/I_G$ |
|----------------|-----------|
| Pristine MXene | 0.931     |
| MX@DC-1        | 0.936     |
| MX@DC-2        | 0.928     |
| MX@DC-5        | 0.923     |
| MX@DC-10       | 0.892     |



**Table S3.** A summary on tensile and strain of the pure and functionalized  $\text{Ti}_3\text{C}_2\text{T}_x$  (MXene) films.

| Films                                        | Stress (MPa) | Strain (%) | Ref.                               |
|----------------------------------------------|--------------|------------|------------------------------------|
| Pure $\text{Ti}_3\text{C}_2\text{T}_x$       | 22           | 1          | Ling <i>et al.</i> <sup>[53]</sup> |
| Pure $\text{Ti}_3\text{C}_2\text{T}_x$       | 28.7         | 2.2        | Liu <i>et al.</i> <sup>[54]</sup>  |
| Pure $\text{Ti}_3\text{C}_2\text{T}_x$       | 17.4         | 6.2        | Zhou <i>et al.</i> <sup>[41]</sup> |
| PANI@ $\text{Ti}_3\text{C}_2\text{T}_x$      | 33.2         | 4          | Zhou <i>et al.</i> <sup>[55]</sup> |
| PEDOT-PSS@ $\text{Ti}_3\text{C}_2\text{T}_x$ | 38.5         | 0.28       | Wan <i>et al.</i> <sup>[56]</sup>  |
| PEDOT-PSS@ $\text{Ti}_3\text{C}_2\text{T}_x$ | 30           | 1.5        | Liu <i>et al.</i> <sup>[29]</sup>  |
| Pure $\text{Ti}_3\text{C}_2\text{T}_x$       | 37           | 3.5        | Wan <i>et al.</i> <sup>[28]</sup>  |
| Heated $\text{Ti}_3\text{C}_2\text{T}_x$     | 32           | 0.24       | Zhao <i>et al.</i> <sup>[57]</sup> |
| DC@ $\text{Ti}_3\text{C}_2\text{T}_x$        | 39.2         | 2.2        | This work                          |

**Table S4.** A summary on EMI SE of the pure and functionalized  $\text{Ti}_3\text{C}_2\text{T}_x$  (MXene) films.

| Films                                               | EMI SE (dB) | Thickness ( $\mu\text{m}$ ) | Ref.                                |
|-----------------------------------------------------|-------------|-----------------------------|-------------------------------------|
| $\text{Ti}_3\text{C}_2\text{T}_x/\text{PEDOT:PSS}$  | 42.1        | 11.1                        | Liu <i>et al.</i> <sup>[29]</sup>   |
| $\text{Ti}_3\text{C}_2\text{T}_x/\text{AgNW}$       | 42.7        | 16.9                        | Miao <i>et al.</i> <sup>[58]</sup>  |
| $\text{Ti}_3\text{C}_2\text{T}_x/\text{CA Aerogel}$ | 54.3        | 26                          | Zhou <i>et al.</i> <sup>[59]</sup>  |
| $\text{Ti}_3\text{C}_2\text{T}_x/\text{MMT}$        | 65          | 25                          | Li <i>et al.</i> <sup>[60]</sup>    |
| $\text{Ti}_3\text{C}_2\text{T}_x/\text{c-PANI}$     | 36          | 40                          | Zhang <i>et al.</i> <sup>[61]</sup> |
| $\text{PEDOT:PSS-Ti}_3\text{C}_2\text{T}_x$         | 41          | 60                          | Bora <i>et al.</i> <sup>[62]</sup>  |
| $\text{Ti}_3\text{C}_2\text{T}_x/\text{CNF}$        | 24          | 47                          | Cao <i>et al.</i> <sup>[40]</sup>   |
| $\text{DC@Ti}_3\text{C}_2\text{T}_x$                | 66.2        | 15                          | This work                           |
